# Supplementary material
Source: Springer Nature journal article supplement (https://www.springermedizin.de/resource/supplementary/12936_2011_2083_MOESM7_ESM.pdf/9543368)

(A)

(B)

1 2 3 4 5 6 7 8 9 10 11

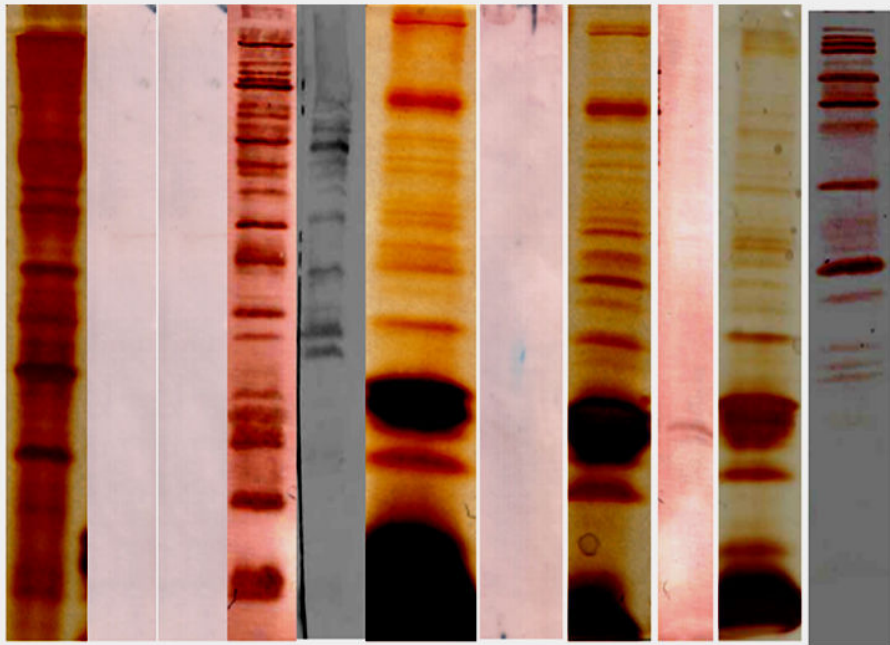

Supplement: MOESM7 [file 9543368]
